# Supplementary material for: Assessing the accuracy of remotely-sensed fire datasets across the Southwestern Mediterranean basin
Source: Copernicus journal article supplement (doi:10.5194/nhess-2020-230), 2020-07-27
Supplement: Supplementary file [file nhess-2020-230-AC1-supplement.pdf]

General comments:

The paper describes a comparative analysis of the performance of remotely sensed fire datasets. This work is quite interesting and could lead to important discoveries in future forest fire work. I believe your paper would benefit greatly from some minor corrections. Specifically, I would like to see some improvements on the overall flow of the paper. I feel these corrections would make this article an excellent research article suitable for publication.

We thank the reviewer for the positive comments to our manuscript.

Specific comments:

Lines 45, 62, 64, 71 and 247 seem to require technical corrections as do some other areas.

L 45: We rewrote the sentence as “The MODIS sensor outstands as one of the best data provider for most burned area products such as MCD64A1 (Giglio et al., 2018) and FireCCI50 (Chuvieco et al., 2018).”

L 62: We rewrote the sentence as “Previous studies indicated that rigorous evaluation of satellite data with ground-based data is needed (Turco et al., 2019).”

L 71: We rewrote the sentence as “To answer these questions, we assessed both spatial and temporal uncertainties in RS BA and NF data aggregated at monthly and 0.25° resolutions across a range of individual fire size thresholds (1 to 500 ha).”

L 247: We corrected the sentence as “This may arise from the use of a spatially explicit cut-off threshold...”

Figure 1 requires some work as it is unclear what units are being used for the legends and MASL is not explained or found anywhere else in the text.

In response to this suggestion, Figure 1 was modified and we replaced the topography with the countries' boundaries to guide the reader. Please see below:

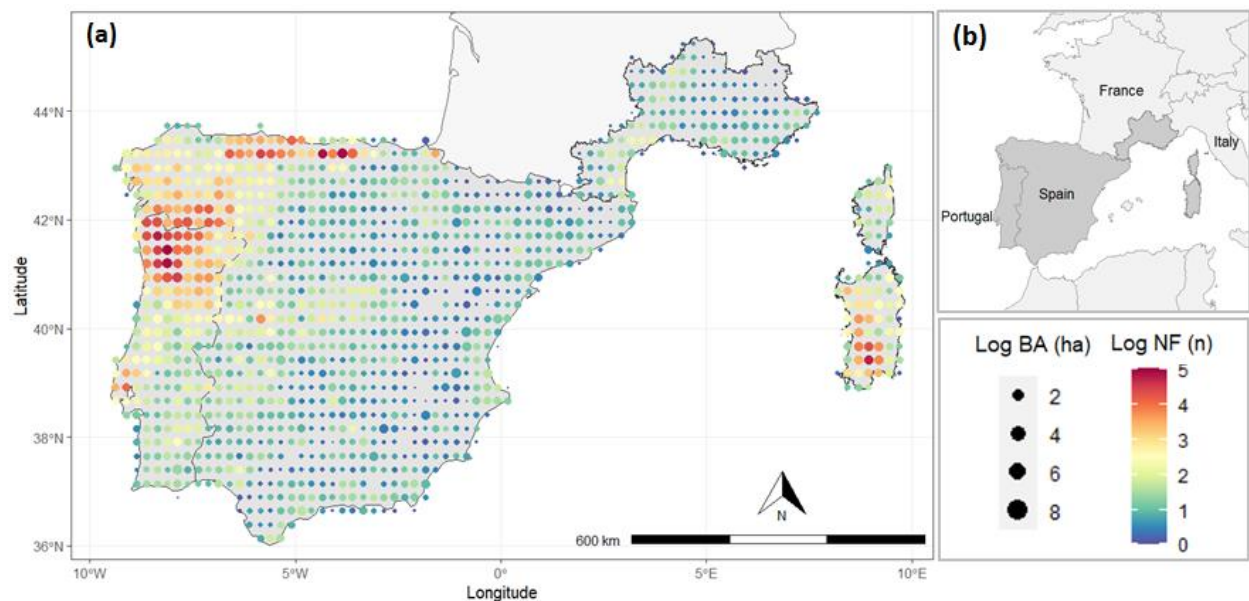

**Figure 1.** (a) Mean annual burned area (BA, depicted by circle size) and mean annual number of fires (NF, depicted by color) at 0.25° resolution over the study period (2005-2015). (b) Spatial extent of the AG dataset.

Figure 4 requires a legend.

The legend of Figure 4 has been included. Please see below:

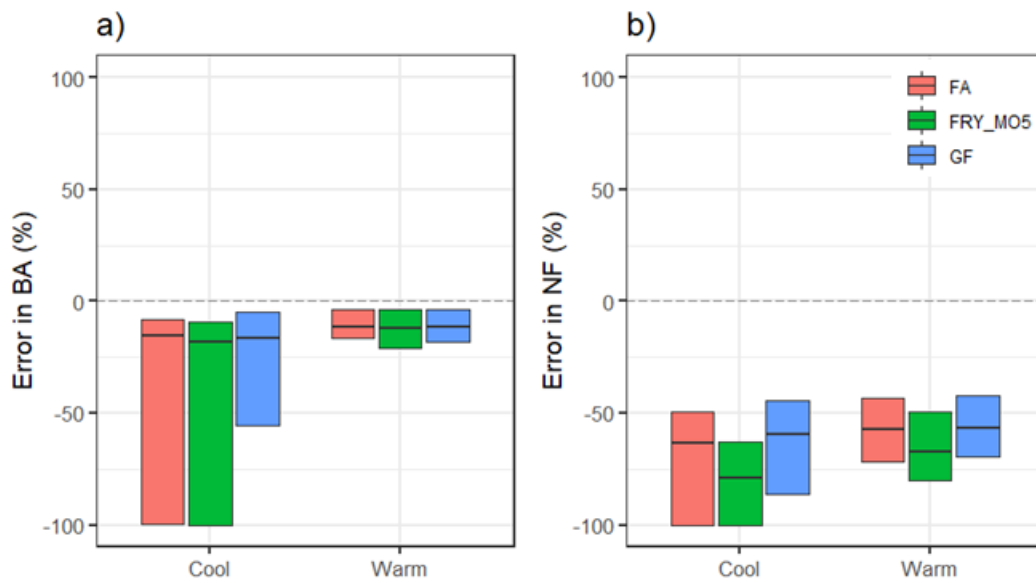

**Figure 4.** Seasonal error ( $\epsilon$ ) for (a) burned area and (b) number of fires in each RS dataset for all fires >1 ha across the studied area with respect to AG dataset. Cool season from November to April and warm season from May to October.
